# Supplementary material for: Automatic segmentation of uterine endometrial cancer on multi-sequence MRI using a convolutional neural network
Source: PubMed Central journal article supplement (PMC8280152; doi:10.1038/s41598-021-93792-7), 2021-07-14
Supplement: 41598_2021_93792_MOESM1_ESM.pdf [file 41598_2021_93792_MOESM1_ESM.pdf]

Automatic segmentation of uterine endometrial cancer on multi-sequence MRI using a convolutional neural network

Yasuhisa Kurata, MD PhD,<sup>1</sup> Mizuho Nishio\*, MD PhD,<sup>1,2</sup> Yusaku Moribata, MD PhD,<sup>1,3</sup> Aki Kido, MD PhD,<sup>1</sup> Yuki Himoto, MD PhD,<sup>1</sup> Satoshi Otani, MD,<sup>1</sup> Koji Fujimoto, MD PhD,<sup>4</sup> Masahiro Yakami, MD PhD,<sup>1,3</sup> Sachiko Minamiguchi, MD PhD,<sup>5</sup> Masaki Mandai, MD PhD,<sup>6</sup> Yuji Nakamoto, MD PhD<sup>1</sup>

<sup>1</sup>Department of Diagnostic Imaging and Nuclear Medicine, Kyoto University Graduate School of Medicine, 54 Kawahara-cho, Shogoin, Sakyo-ku, Kyoto 606-8507, Japan

<sup>2</sup>Department of Radiology, Kobe University Hospital, 7-5-2 Kusunoki-cho, Chuo-ku, Kobe 650-0017, Japan.

<sup>3</sup>Preemptive Medicine and Lifestyle-Related Disease Research Center, Kyoto University Hospital, 54 Kawahara-cho, Shogoin, Sakyo-ku, Kyoto 606-8507, Japan

<sup>4</sup>Department of Real World Data Research and Development, Graduate School of Medicine, Kyoto University, 54 Kawahara-cho, Shogoin, Sakyo-ku, Kyoto 606-8507, Japan

<sup>5</sup>Department of Diagnostic Pathology, Kyoto University Graduate School of Medicine, 54 Kawahara-cho, Shogoin, Sakyo-ku, Kyoto 606-8507, Japan

<sup>6</sup>Department of Gynecology and Obstetrics, Kyoto University Graduate School of Medicine, 54 Kawahara-cho, Shogoin, Sakyo-ku, Kyoto 606-8507, Japan

Figure S1-5: The learning curve of our final model with five-fold cross-validation

loss: Training loss

val\_loss: Validation loss

Figure S1

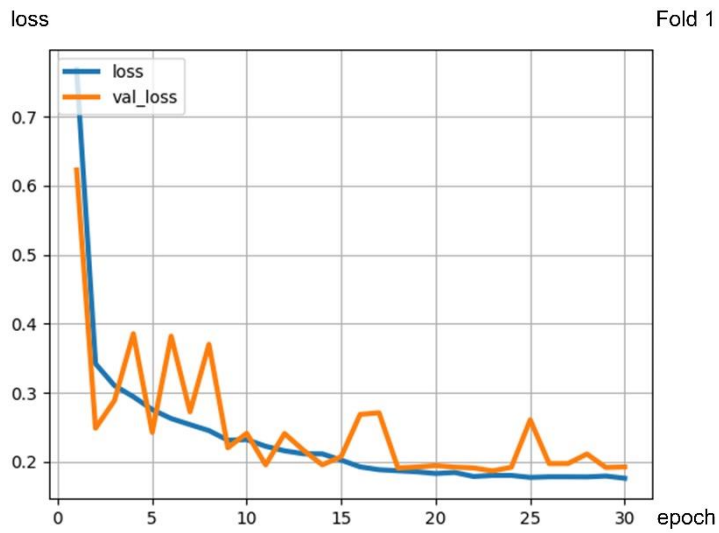

Figure S2

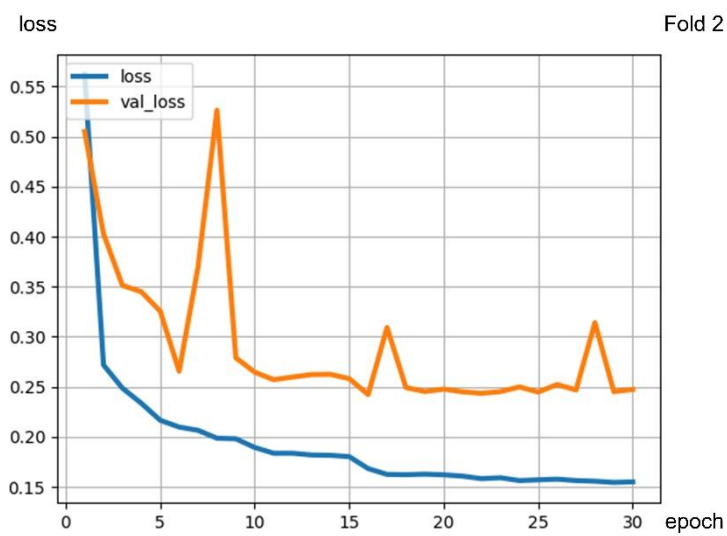

Figure S3

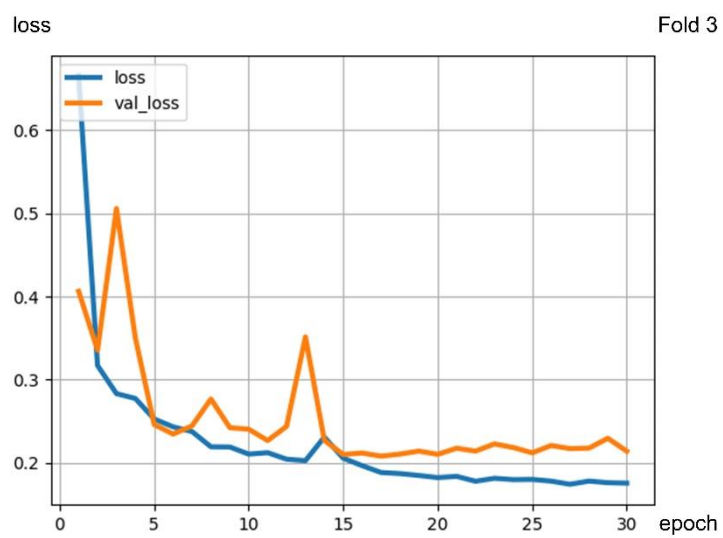

Figure S4

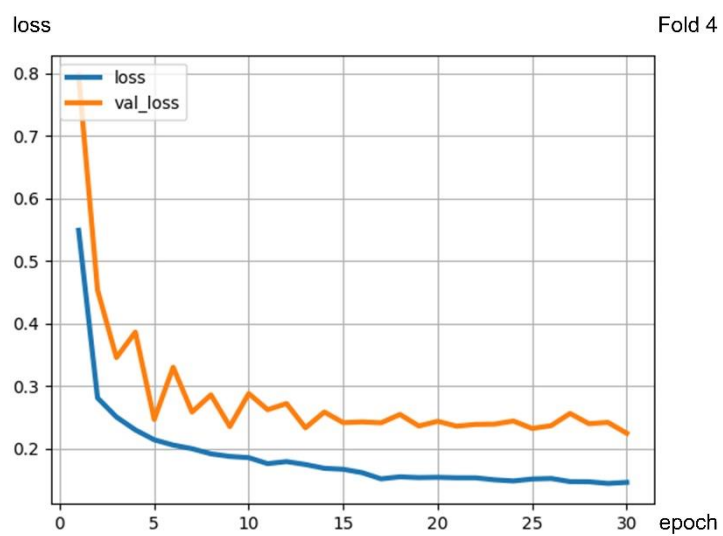

Figure S5

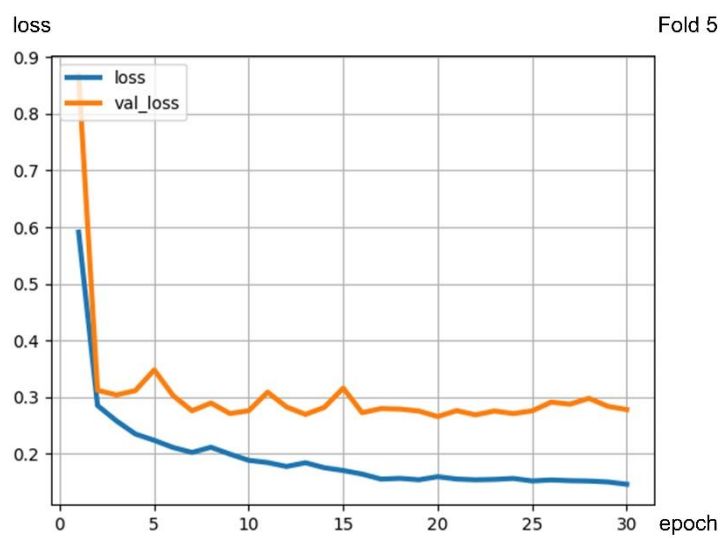

Table S1: Clinical characteristics of the training and test datasets

| Variable                 | Training dataset | Test dataset | p-value |
|--------------------------|------------------|--------------|---------|
| Number of patients       | 180              | 20           |         |
| Age                      | 59.4 ± 10.2      | 55.3 ± 9.7   | 0.09    |
| Histological grade       |                  |              | 1.00    |
| Low grade                | 119              | 13           |         |
| High grade               | 61               | 7            |         |
| FIGO stage               |                  |              | 0.54    |
| I                        | 125              | 12           |         |
| II                       | 13               | 3            |         |
| III                      | 39               | 5            |         |
| IV                       | 3                | 0            |         |
| Deep myometrial invasion |                  |              | 0.63    |
| Positive                 | 67               | 6            |         |
| Negative                 | 113              | 14           |         |

Patient age is presented as the mean and standard deviation.

FIGO: International Federation of Gynecology and Obstetrics

Table S2: Magnetic resonance imaging parameters

| Parameter               | T1WI        | T2WI            | DWI         | Dynamic-CE T1WI |
|-------------------------|-------------|-----------------|-------------|-----------------|
| TR (msec)               | 400-655     | 3730-7760       | 2300-5300/  | 4.7             |
| TE (msec)               | 11-30       | 81-120          | 59-79       | 2.3             |
| FOV (mm)                | 260×260     | 260×260         | 260×195-260 | 190-260×260     |
| FA (degrees)            | 80          | 150             | 90          | 10              |
| Band width,<br>Hz/pixel | 100-140     | 140-370         | 1445-2170   | 580             |
| Matrix size             | 527×224-348 | 448-512×204-512 | 128×128     | 320-384×198-230 |
| Slice thickness<br>(mm) | 4-6         | 4-5             | 4-5         | 5               |

T1WI: T1-weighted image

T2WI: T2-weighted image

DWI: diffusion-weighted image

CE: contrast-enhanced

TR: repetition time

TE: echo time

FOV: field of view

FA: flip angle

Table S3: Summary of our U-Net model

| Layer (type)                               | Output Shape         | Param | Connected to                |
|--------------------------------------------|----------------------|-------|-----------------------------|
| input_1 (InputLayer)                       | [None, 512, 512, 3]  | 0     |                             |
| conv2d_1 (Conv2D)                          | (None, 512, 512, 8)  | 224   | input_1[0][0]               |
| batch_normalization_1 (BatchNormalization) | (None, 512, 512, 8)  | 32    | conv2d_1[0][0]              |
| leaky_re_lu_1 (LeakyReLU)                  | (None, 512, 512, 8)  | 0     | batch_normalization_1[0][0] |
| dropout_1 (Dropout)                        | (None, 512, 512, 8)  | 0     | leaky_re_lu_1[0][0]         |
| conv2d_2 (Conv2D)                          | (None, 512, 512, 8)  | 584   | dropout_1[0][0]             |
| batch_normalization_2 (BatchNormalization) | (None, 512, 512, 8)  | 32    | conv2d_2[0][0]              |
| leaky_re_lu_2 (LeakyReLU)                  | (None, 512, 512, 8)  | 0     | batch_normalization_2[0][0] |
| dropout_2 (Dropout)                        | (None, 512, 512, 8)  | 0     | leaky_re_lu_2[0][0]         |
| max_pooling2d_1 (MaxPooling2D)             | (None, 256, 256, 8)  | 0     | dropout_2[0][0]             |
| conv2d_3 (Conv2D)                          | (None, 256, 256, 16) | 1168  | max_pooling2d_1[0][0]       |
| batch_normalization_3 (BatchNormalization) | (None, 256, 256, 16) | 64    | conv2d_3[0][0]              |
| leaky_re_lu_3 (LeakyReLU)                  | (None, 256, 256, 16) | 0     | batch_normalization_3[0][0] |

---

|                                            |                      |      |                             |
|--------------------------------------------|----------------------|------|-----------------------------|
| dropout_3 (Dropout)                        | (None, 256, 256, 16) | 0    | leaky_re_lu_3[0][0]         |
| conv2d_4 (Conv2D)                          | (None, 256, 256, 16) | 2320 | dropout_3[0][0]             |
| batch_normalization_4 (BatchNormalization) | (None, 256, 256, 16) | 64   | conv2d_4[0][0]              |
| leaky_re_lu_4 (LeakyReLU)                  | (None, 256, 256, 16) | 0    | batch_normalization_4[0][0] |
| dropout_4 (Dropout)                        | (None, 256, 256, 16) | 0    | leaky_re_lu_4[0][0]         |
| max_pooling2d_2 (MaxPooling2D)             | (None, 128, 128, 16) | 0    | dropout_4[0][0]             |
| conv2d_5 (Conv2D)                          | (None, 128, 128, 16) | 2320 | max_pooling2d_2[0][0]       |
| batch_normalization_5 (BatchNormalization) | (None, 128, 128, 16) | 64   | conv2d_5[0][0]              |
| leaky_re_lu_5 (LeakyReLU)                  | (None, 128, 128, 16) | 0    | batch_normalization_5[0][0] |
| dropout_5 (Dropout)                        | (None, 128, 128, 16) | 0    | leaky_re_lu_5[0][0]         |
| conv2d_6 (Conv2D)                          | (None, 128, 128, 16) | 2320 | dropout_5[0][0]             |
| batch_normalization_6 (BatchNormalization) | (None, 128, 128, 16) | 64   | conv2d_6[0][0]              |
| leaky_re_lu_6 (LeakyReLU)                  | (None, 128, 128, 16) | 0    | batch_normalization_6[0][0] |
| dropout_6 (Dropout)                        | (None, 128, 128, 16) | 0    | leaky_re_lu_6[0][0]         |

---



|                                            |                    |      |                             |
|--------------------------------------------|--------------------|------|-----------------------------|
| max_pooling2d_3 (MaxPooling2D)             | (None, 64, 64, 16) | 0    | dropout_6[0][0]             |
| conv2d_7 (Conv2D)                          | (None, 64, 64, 16) | 2320 | max_pooling2d_3[0][0]       |
| batch_normalization_7 (BatchNormalization) | (None, 64, 64, 16) | 64   | conv2d_7[0][0]              |
| leaky_re_lu_7 (LeakyReLU)                  | (None, 64, 64, 16) | 0    | batch_normalization_7[0][0] |
| dropout_7 (Dropout)                        | (None, 64, 64, 16) | 0    | leaky_re_lu_7[0][0]         |
| conv2d_8 (Conv2D)                          | (None, 64, 64, 16) | 2320 | dropout_7[0][0]             |
| batch_normalization_8 (BatchNormalization) | (None, 64, 64, 16) | 64   | conv2d_8[0][0]              |
| leaky_re_lu_8 (LeakyReLU)                  | (None, 64, 64, 16) | 0    | batch_normalization_8[0][0] |
| dropout_8 (Dropout)                        | (None, 64, 64, 16) | 0    | leaky_re_lu_8[0][0]         |
| max_pooling2d_4 (MaxPooling2D)             | (None, 32, 32, 16) | 0    | dropout_8[0][0]             |
| conv2d_9 (Conv2D)                          | (None, 32, 32, 16) | 2320 | max_pooling2d_4[0][0]       |
| batch_normalization_9 (BatchNormalization) | (None, 32, 32, 16) | 64   | conv2d_9[0][0]              |
| leaky_re_lu_9 (LeakyReLU)                  | (None, 32, 32, 16) | 0    | batch_normalization_9[0][0] |
| dropout_9 (Dropout)                        | (None, 32, 32, 16) | 0    | leaky_re_lu_9[0][0]         |
| conv2d_10 (Conv2D)                         | (None, 32, 32, 16) | 2320 | dropout_9[0][0]             |

---

|                                             |                    |      |                              |
|---------------------------------------------|--------------------|------|------------------------------|
| batch_normalization_10 (BatchNormalization) | (None, 32, 32, 16) | 64   | conv2d_10[0][0]              |
| leaky_re_lu_10 (LeakyReLU)                  | (None, 32, 32, 16) | 0    | batch_normalization_10[0][0] |
| dropout_10 (Dropout)                        | (None, 32, 32, 16) | 0    | leaky_re_lu_10[0][0]         |
| max_pooling2d_5 (MaxPooling2D)              | (None, 16, 16, 16) | 0    | dropout_10[0][0]             |
| conv2d_11 (Conv2D)                          | (None, 16, 16, 16) | 2320 | max_pooling2d_5[0][0]        |
| batch_normalization_11 (BatchNormalization) | (None, 16, 16, 16) | 64   | conv2d_11[0][0]              |
| leaky_re_lu_11 (LeakyReLU)                  | (None, 16, 16, 16) | 0    | batch_normalization_11[0][0] |
| dropout_11 (Dropout)                        | (None, 16, 16, 16) | 0    | leaky_re_lu_11[0][0]         |
| conv2d_12 (Conv2D)                          | (None, 16, 16, 16) | 2320 | dropout_11[0][0]             |
| batch_normalization_12 (BatchNormalization) | (None, 16, 16, 16) | 64   | conv2d_12[0][0]              |
| leaky_re_lu_12 (LeakyReLU)                  | (None, 16, 16, 16) | 0    | batch_normalization_12[0][0] |
| dropout_12 (Dropout)                        | (None, 16, 16, 16) | 0    | leaky_re_lu_12[0][0]         |
| up_sampling2d_1 (UpSampling2D)              | (None, 32, 32, 16) | 0    | dropout_12[0][0]             |
| conv2d_13 (Conv2D)                          | (None, 32, 32, 16) | 2320 | up_sampling2d_1[0][0]        |

---

|                                             |                    |      |                                      |
|---------------------------------------------|--------------------|------|--------------------------------------|
| batch_normalization_13 (BatchNormalization) | (None, 32, 32, 16) | 64   | conv2d_13[0][0]                      |
| leaky_re_lu_13 (LeakyReLU)                  | (None, 32, 32, 16) | 0    | batch_normalization_13[0][0]         |
| dropout_13 (Dropout)                        | (None, 32, 32, 16) | 0    | leaky_re_lu_13[0][0]                 |
| concatenate_1 (Concatenate)                 | (None, 32, 32, 32) | 0    | dropout_13[0][0]<br>dropout_10[0][0] |
| conv2d_14 (Conv2D)                          | (None, 32, 32, 16) | 4624 | concatenate_1[0][0]                  |
| batch_normalization_14 (BatchNormalization) | (None, 32, 32, 16) | 64   | conv2d_14[0][0]                      |
| leaky_re_lu_14 (LeakyReLU)                  | (None, 32, 32, 16) | 0    | batch_normalization_14[0][0]         |
| dropout_14 (Dropout)                        | (None, 32, 32, 16) | 0    | leaky_re_lu_14[0][0]                 |
| conv2d_15 (Conv2D)                          | (None, 32, 32, 16) | 2320 | dropout_14[0][0]                     |
| batch_normalization_15 (BatchNormalization) | (None, 32, 32, 16) | 64   | conv2d_15[0][0]                      |
| leaky_re_lu_15 (LeakyReLU)                  | (None, 32, 32, 16) | 0    | batch_normalization_15[0][0]         |
| dropout_15 (Dropout)                        | (None, 32, 32, 16) | 0    | leaky_re_lu_15[0][0]                 |
| up_sampling2d_2 (UpSampling2D)              | (None, 64, 64, 16) | 0    | dropout_15[0][0]                     |
| conv2d_16 (Conv2D)                          | (None, 64, 64, 16) | 2320 | up_sampling2d_2[0][0]                |

|                                             |                      |      |                                     |
|---------------------------------------------|----------------------|------|-------------------------------------|
| batch_normalization_16 (BatchNormalization) | (None, 64, 64, 16)   | 64   | conv2d_16[0][0]                     |
| leaky_re_lu_16 (LeakyReLU)                  | (None, 64, 64, 16)   | 0    | batch_normalization_16[0][0]        |
| dropout_16 (Dropout)                        | (None, 64, 64, 16)   | 0    | leaky_re_lu_16[0][0]                |
| concatenate_2 (Concatenate)                 | (None, 64, 64, 32)   | 0    | dropout_16[0][0]<br>dropout_8[0][0] |
| conv2d_17 (Conv2D)                          | (None, 64, 64, 16)   | 4624 | concatenate_2[0][0]                 |
| batch_normalization_17 (BatchNormalization) | (None, 64, 64, 16)   | 64   | conv2d_17[0][0]                     |
| leaky_re_lu_17 (LeakyReLU)                  | (None, 64, 64, 16)   | 0    | batch_normalization_17[0][0]        |
| dropout_17 (Dropout)                        | (None, 64, 64, 16)   | 0    | leaky_re_lu_17[0][0]                |
| conv2d_18 (Conv2D)                          | (None, 64, 64, 16)   | 2320 | dropout_17[0][0]                    |
| batch_normalization_18 (BatchNormalization) | (None, 64, 64, 16)   | 64   | conv2d_18[0][0]                     |
| leaky_re_lu_18 (LeakyReLU)                  | (None, 64, 64, 16)   | 0    | batch_normalization_18[0][0]        |
| dropout_18 (Dropout)                        | (None, 64, 64, 16)   | 0    | leaky_re_lu_18[0][0]                |
| up_sampling2d_3 (UpSampling2D)              | (None, 128, 128, 16) | 0    | dropout_18[0][0]                    |
| conv2d_19 (Conv2D)                          | (None, 128, 128, 16) | 2320 | up_sampling2d_3[0][0]               |

|                                             |                      |      |                                     |
|---------------------------------------------|----------------------|------|-------------------------------------|
| batch_normalization_19 (BatchNormalization) | (None, 128, 128, 16) | 64   | conv2d_19[0][0]                     |
| leaky_re_lu_19 (LeakyReLU)                  | (None, 128, 128, 16) | 0    | batch_normalization_19[0][0]        |
| dropout_19 (Dropout)                        | (None, 128, 128, 16) | 0    | leaky_re_lu_19[0][0]                |
| concatenate_3 (Concatenate)                 | (None, 128, 128, 32) | 0    | dropout_19[0][0]<br>dropout_6[0][0] |
| conv2d_20 (Conv2D)                          | (None, 128, 128, 16) | 4624 | concatenate_3[0][0]                 |
| batch_normalization_20 (BatchNormalization) | (None, 128, 128, 16) | 64   | conv2d_20[0][0]                     |
| leaky_re_lu_20 (LeakyReLU)                  | (None, 128, 128, 16) | 0    | batch_normalization_20[0][0]        |
| dropout_20 (Dropout)                        | (None, 128, 128, 16) | 0    | leaky_re_lu_20[0][0]                |
| conv2d_21 (Conv2D)                          | (None, 128, 128, 16) | 2320 | dropout_20[0][0]                    |
| batch_normalization_21 (BatchNormalization) | (None, 128, 128, 16) | 64   | conv2d_21[0][0]                     |
| leaky_re_lu_21 (LeakyReLU)                  | (None, 128, 128, 16) | 0    | batch_normalization_21[0][0]        |
| dropout_21 (Dropout)                        | (None, 128, 128, 16) | 0    | leaky_re_lu_21[0][0]                |
| up_sampling2d_4 (UpSampling2D)              | (None, 256, 256, 16) | 0    | dropout_21[0][0]                    |
| conv2d_22 (Conv2D)                          | (None, 256, 256, 16) | 2320 | up_sampling2d_4[0][0]               |

|                                             |                      |      |                                     |
|---------------------------------------------|----------------------|------|-------------------------------------|
| batch_normalization_22 (BatchNormalization) | (None, 256, 256, 16) | 64   | conv2d_22[0][0]                     |
| leaky_re_lu_22 (LeakyReLU)                  | (None, 256, 256, 16) | 0    | batch_normalization_22[0][0]        |
| dropout_22 (Dropout)                        | (None, 256, 256, 16) | 0    | leaky_re_lu_22[0][0]                |
| concatenate_4 (Concatenate)                 | (None, 256, 256, 32) | 0    | dropout_22[0][0]<br>dropout_4[0][0] |
| conv2d_23 (Conv2D)                          | (None, 256, 256, 16) | 4624 | concatenate_4[0][0]                 |
| batch_normalization_23 (BatchNormalization) | (None, 256, 256, 16) | 64   | conv2d_23[0][0]                     |
| leaky_re_lu_23 (LeakyReLU)                  | (None, 256, 256, 16) | 0    | batch_normalization_23[0][0]        |
| dropout_23 (Dropout)                        | (None, 256, 256, 16) | 0    | leaky_re_lu_23[0][0]                |
| conv2d_24 (Conv2D)                          | (None, 256, 256, 16) | 2320 | dropout_23[0][0]                    |
| batch_normalization_24 (BatchNormalization) | (None, 256, 256, 16) | 64   | conv2d_24[0][0]                     |
| leaky_re_lu_24 (LeakyReLU)                  | (None, 256, 256, 16) | 0    | batch_normalization_24[0][0]        |
| dropout_24 (Dropout)                        | (None, 256, 256, 16) | 0    | leaky_re_lu_24[0][0]                |
| up_sampling2d_5 (UpSampling2D)              | (None, 512, 512, 16) | 0    | dropout_24[0][0]                    |
| conv2d_25 (Conv2D)                          | (None, 512, 512, 8)  | 1160 | up_sampling2d_5[0][0]               |

|                                             |                      |      |                                     |
|---------------------------------------------|----------------------|------|-------------------------------------|
| batch_normalization_25 (BatchNormalization) | (None, 512, 512, 8)  | 32   | conv2d_25[0][0]                     |
| leaky_re_lu_25 (LeakyReLU)                  | (None, 512, 512, 8)  | 0    | batch_normalization_25[0][0]        |
| dropout_25 (Dropout)                        | (None, 512, 512, 8)  | 0    | leaky_re_lu_25[0][0]                |
| concatenate_5 (Concatenate)                 | (None, 512, 512, 16) | 0    | dropout_25[0][0]<br>dropout_2[0][0] |
| conv2d_26 (Conv2D)                          | (None, 512, 512, 8)  | 1160 | concatenate_5[0][0]                 |
| batch_normalization_26 (BatchNormalization) | (None, 512, 512, 8)  | 32   | conv2d_26[0][0]                     |
| leaky_re_lu_26 (LeakyReLU)                  | (None, 512, 512, 8)  | 0    | batch_normalization_26[0][0]        |
| dropout_26 (Dropout)                        | (None, 512, 512, 8)  | 0    | leaky_re_lu_26[0][0]                |
| conv2d_27 (Conv2D)                          | (None, 512, 512, 8)  | 584  | dropout_26[0][0]                    |
| batch_normalization_27 (BatchNormalization) | (None, 512, 512, 8)  | 32   | conv2d_27[0][0]                     |
| leaky_re_lu_27 (LeakyReLU)                  | (None, 512, 512, 8)  | 0    | batch_normalization_27[0][0]        |
| dropout_27 (Dropout)                        | (None, 512, 512, 8)  | 0    | leaky_re_lu_27[0][0]                |
| conv2d_28 (Conv2D)                          | (None, 512, 512, 3)  | 27   | dropout_27[0][0]                    |
| activation_1 (Activation)                   | (None, 512, 512, 3)  | 0    | conv2d_28[0][0]                     |

=====
